# Supplementary material for: Age and sex-specific analysis of mixed dyslipidaemia among patients with type 2 diabetes mellitus in the Ho municipality: A cross-sectional study
Source: Research Square preprint supplement (doi:10.21203/rs.3.rs-6239703/v1), 2025-05-05

QUESTIONNAIRE

REF. CODE: _______ Date: __ /__ /__

I have given my consent to participate in this study. Yes / No

A. PERSONAL DETAILS

1. Residence………………………………………

2. Age: ………… Sex…... Marital Status………...

3. Body Weight (BW)……... Height……….

4. Waist Circumference (WC)……Hip Circumference………

5. Blood Pressure (BP): ………

B. EDUCATIONAL BACKGROUND AND OCCUPATION

6. Level of education

None
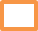
 Basic
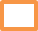
 Secondary
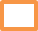
 Tertiary
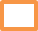


7. Type of Work: None
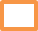
 Informal
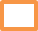
 Formal
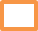


8. How many hours do you work a day?.............

C. PERSONAL HISTORY

9. Have you been diagnosed of hypertension? (Yes /No)

If yes, for how long?....................

10. Do you exercise? (Yes/ No). If yes, how many times per week...........

11. Do you drink alcohol currently? (Yes/No)

If no, have you ever drunk alcohol? (Yes/No)

If yes, for how long?.........................

Do you smoke currently? (Yes/No)

If yes, how long have you been smoking?...................

If no, have you ever smoked? (Yes / No)

If yes, when did you stop?...........................

12. How long have you been diagnosed of diabetes…………………

13. What type(s) of diabetic treatment are you undertaking? Oral
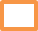
Insulin injection
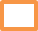
 For how long have you been on treatment?...............

Have you been diagnosed of any disease such as the following? Cardiovascular disease
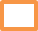
 Kidney disease
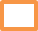
 Hypertension
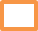
 Liver disease
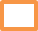
 Thyroid disease
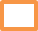


***For female participants only;***

Are you currently on any contraceptive medication?............

**FAMILY HISTORY**

Do you have any family history of the following diseases? Diabetes
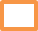
 Hypertension
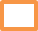
 Cardiovascular disease
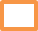

Supplement: Supplementary file 1 [file 198cc392fdb7caf37dc1ee6c.docx]
